# Supplementary material for: Protein Intake and Distribution in Relation to Physical Functioning and Quality of Life in Community-Dwelling Elderly People: Acknowledging the Role of Physical Activity
Source: PubMed Central journal article supplement (PMC5946291; doi:10.3390/nu10040506), 2018-04-19
Supplement: nutrients-10-00506-s001.pdf [file nutrients-10-00506-s001.pdf]

**Table S1.** Tertiles based on distribution pattern of protein intake (CV).

| <b>Variables</b>                 | <b>Spread</b><br>(<0.43) | <b>Intermediate</b><br>(0.43-0.62) | <b>Pulse</b><br>(>0.62) | <b>P-value</b>    |
|----------------------------------|--------------------------|------------------------------------|-------------------------|-------------------|
|                                  | <i>n</i> =46             | <i>n</i> =48                       | <i>n</i> =46            |                   |
| Age, y                           | 83 (81-86)               | 82(75-83)                          | 83(78-84)               | 0.10 <sup>1</sup> |
| Male, %                          | 34 (74)                  | 27 (56)                            | 29 (63)                 | 0.20 <sup>1</sup> |
| Current smokers, n (%)           | 1 (2)                    | 1 (2)                              | 0 (0)                   | 0.68 <sup>3</sup> |
| Level of education               |                          |                                    |                         | 0.86 <sup>1</sup> |
| Low, n (%)                       | 4 (9)                    | 6 (13)                             | 4 (9)                   |                   |
| Intermediate, n (%)              | 27 (61)                  | 24 (52)                            | 27 (63)                 |                   |
| High / academic, n (%)           | 13 (30)                  | 16 (35)                            | 12 (28)                 |                   |
| <b>Body composition</b>          |                          |                                    |                         |                   |
| Weight, kg                       |                          |                                    |                         |                   |
| Male                             | 76.3 ± 9.0               | 76.2 ± 11.3                        | 78.3 ± 8.2              | 0.64              |
| Female                           | 65.9 ± 7.6               | 67.9 ± 12.7                        | 72.9 ± 14.9             | 0.28              |
| BMI, kg/m <sup>2</sup>           |                          |                                    |                         |                   |
| Male                             | 25.6 ± 2.6               | 25.9 ± 3.0                         | 26.3 ± 2.6              | 0.61              |
| Female                           | 25.0 ± 2.9               | 26.3 ± 5.0                         | 27.6 ± 5.3              | 0.34              |
| <b>Dietary intake</b>            |                          |                                    |                         |                   |
| Energy, kcal                     |                          |                                    |                         |                   |
| Male                             | 2032 ± 388               | 2115 ± 374                         | 1981 ± 342              | 0.38              |
| Female                           | 1818 ± 411               | 1783 ± 405                         | 1673 ± 383              | 0.58              |
| Carbohydrate intake, en%         | 42.5 ± 6.2               | 43.6 ± 5.9                         | 42.7 ± 5.9              | 0.34              |
| Fat intake, en%                  | 35.4 ± 6.5               | 34.3 ± 4.7                         | 33.7 ± 5.5              | 0.66              |
| Protein intake, en%              | 15.6 ± 2.4               | 17.0 ± 3.7                         | 16.7 ± 2.6              | 0.06              |
| Protein intake, g                | 76.8 ± 18.4              | 82.2 ± 19.7                        | 77.5 ± 18.5             | 0.28              |
| Protein intake at breakfast, g   | 18.9 ± 6.5               | 14.4 ± 5.4                         | 9.8 ± 5.1               | <0.001            |
| Protein intake at lunch, g       | 21.4 ± 6.2               | 25.0 ± 9.7                         | 19.6 ± 11.9             | 0.023             |
| Protein intake at dinner, g      | 26.1 ± 8.5               | 35.3 ± 12.8                        | 39.2 ± 15.7             | <0.001            |
| Protein intake, g/kg/day         | 1.05 ± 0.27              | 1.16 ± 0.31                        | 1.04 ± 0.28             | 0.09              |
| Animal-based protein, %          | 58.6 ± 8.5 *             | 62.5 ± 9.4                         | 64.4 ± 9.0 *            | 0.009             |
| Vitamin D supplementation, n (%) | 9 (20)                   | 11 (23)                            | 10 (22)                 | 0.89 <sup>1</sup> |
| <b>Goldberg-score</b>            |                          |                                    |                         |                   |
| EI/BMR                           | 1.35 ± 0.26              | 1.40 ± 0.28                        | 1.28 ± 0.28             | 0.11              |
| Underreporting, n (%)            | 0 (0)                    | 2 (4)                              | 3 (7)                   |                   |
| Within confidence limits, n (%)  | 46 (100)                 | 46 (96)                            | 43 (93)                 | 0.29 <sup>3</sup> |
| Overreporting, n (%)             | 0 (0)                    | 0 (0)                              | 0 (0)                   |                   |
| <b>Physical activity</b>         |                          |                                    |                         |                   |
| Total activity, METhr/day        | 8.2 (5.8-12.6)           | 9.0 (5.0-15.4)                     | 8.4 (4.7-12.2)          | 0.89 <sup>2</sup> |

|                                 |                  |                 |                  |                    |
|---------------------------------|------------------|-----------------|------------------|--------------------|
| Sports, METhr/day               | 0.7 (0.0-1.7)    | 0.6 (0.0-1.9)   | 0.0 (0.0-0.7)    | 0.045 <sup>2</sup> |
| Household activities, METhr/day | 1.8 (0.3-3.6)    | 3.2 (1.3-6.1)   | 3.5 (0.6-5.7)    | 0.13 <sup>2</sup>  |
| Leisure time, METhr/day         | 4.8 (2.5-8.2)    | 3.4 (1.3-7.1)   | 3.0 (2.0-6.7)    | 0.28 <sup>2</sup>  |
| <b>Muscle parameters</b>        |                  |                 |                  |                    |
| Grip strength, N                | 34 ± 8           | 30 ± 11         | 33 ± 10          | 0.17               |
| SPPB total score                | 11 (10-12)       | 10 (9-11)       | 10 (9-11)        | 0.22 <sup>1</sup>  |
| SPPB balance score              | 4 (3-4)          | 4 (3-4)         | 4 (3-4)          | 0.90 <sup>1</sup>  |
| SPPB gait speed, s              | 3.7 ± 0.7 *      | 4.2 ± 1.1 *     | 4.0 ± 1.0        | 0.045              |
| SPPB chair rise ability time, s | 12.7 ± 3.5       | 14.2 ± 6.2      | 13.4 ± 3.2       | 0.27               |
| <b>Quality of Life</b>          |                  |                 |                  |                    |
| QALY                            | 0.92 (0.88-1.00) | 1.0 (0.86-1.00) | 0.92 (0.86-1.00) | 0.86               |
| Health score                    | 90 (80-95)       | 90 (80-95)      | 85 (75-95)       | 0.25               |

BMI, body mass index; CV, coefficient of variation; EI/BMR, ratio of energy intake and basal metabolic rate; en%, energy percentage; g/kg/d, gram per kilogram of body weight per day; MET, metabolic equivalent of task; N, Newton; SPPB, Short Physical Performance Battery; QALY, Quality-adjusted life year. Categorical values are given as number (percentage) of participants. Parametric continuous values are means ± SDs and non-parametric values are median(IQR). P values for differences between the two groups of protein intake were derived by independent samples t-test unless otherwise indicated. <sup>1</sup> Derived by Chi-square test, <sup>2</sup> Derived by Kruskal-Wallis test. <sup>3</sup> Derived by Fisher's exact test. \* Significant difference between tertiles.
